# Supplementary material for: Bidirectional relationship between olfaction and Parkinson’s disease
Source: bioRxiv or medRxiv preprint supplement (doi:10.1101/2023.10.18.23297218), 2023-10-19

# Supplementary Figure 1 - Manhattan Plots of a) PD and b) ability to smell GWAS

a.

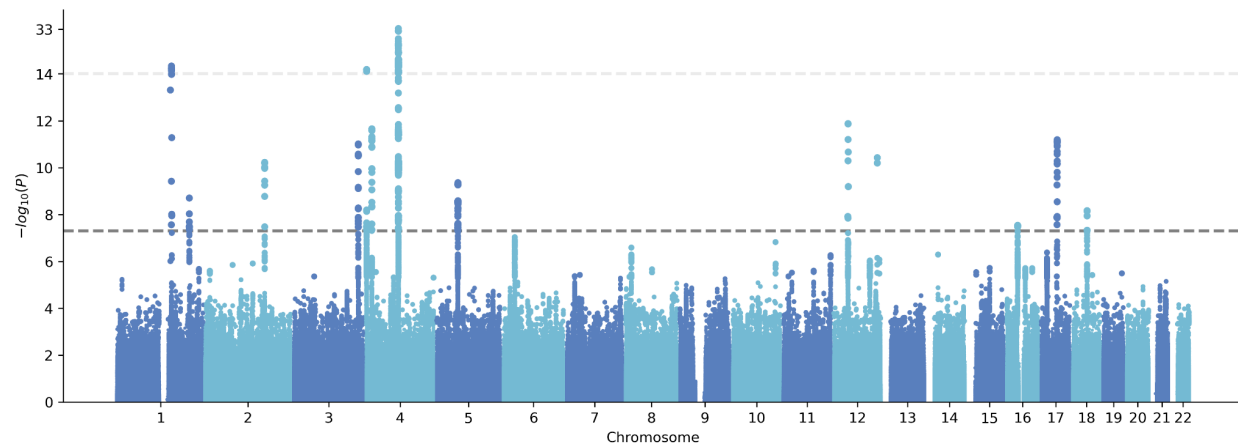

b.

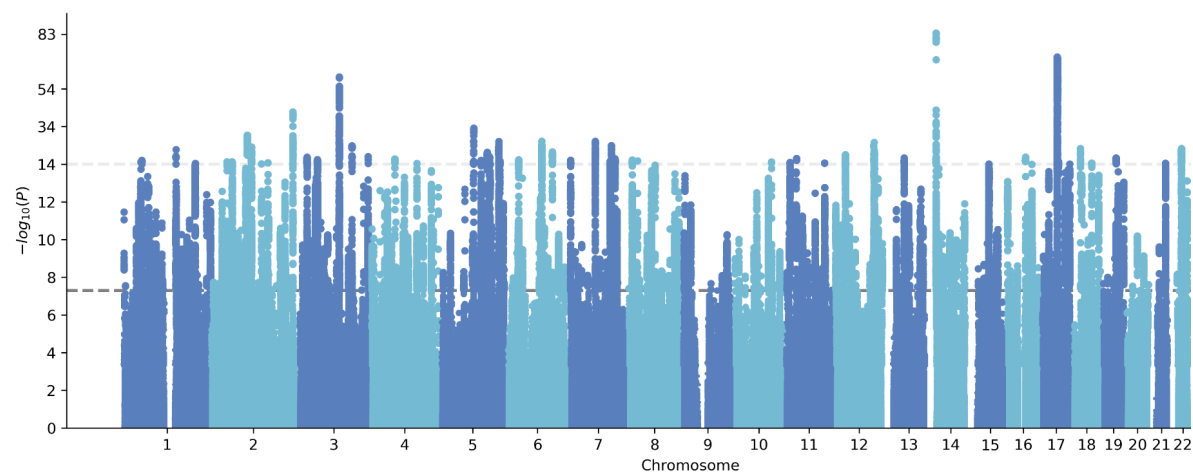

# Supplementary Figure 2 - Forest plot of leave-one-out sensitivity results

PD on ability to smell

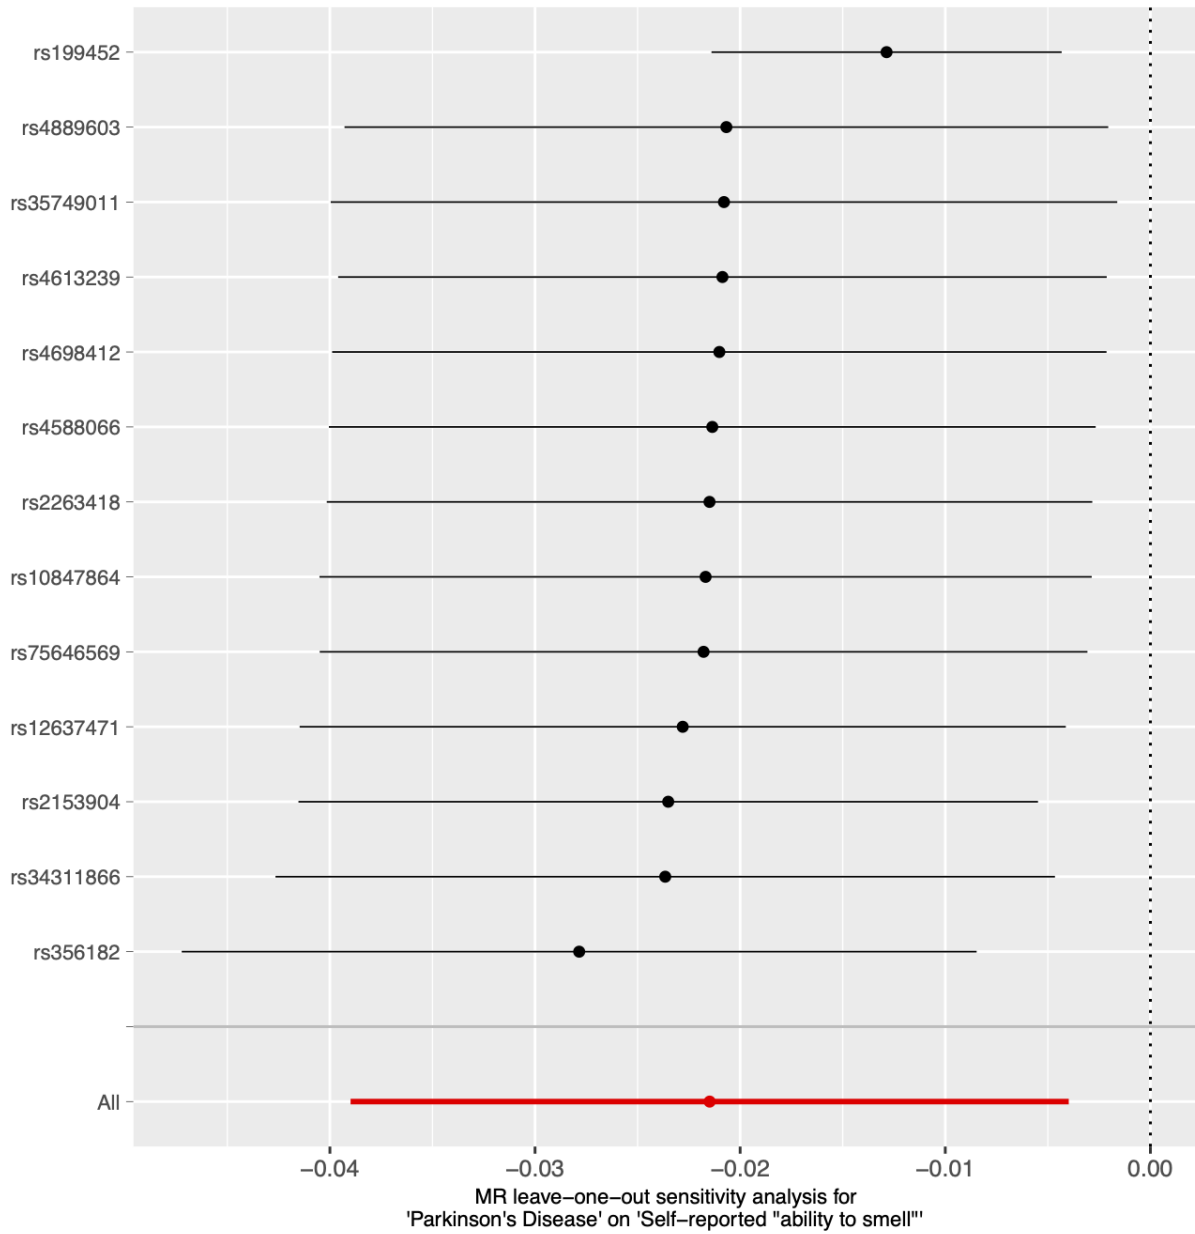

# PD on ability to smell (outliers removed)

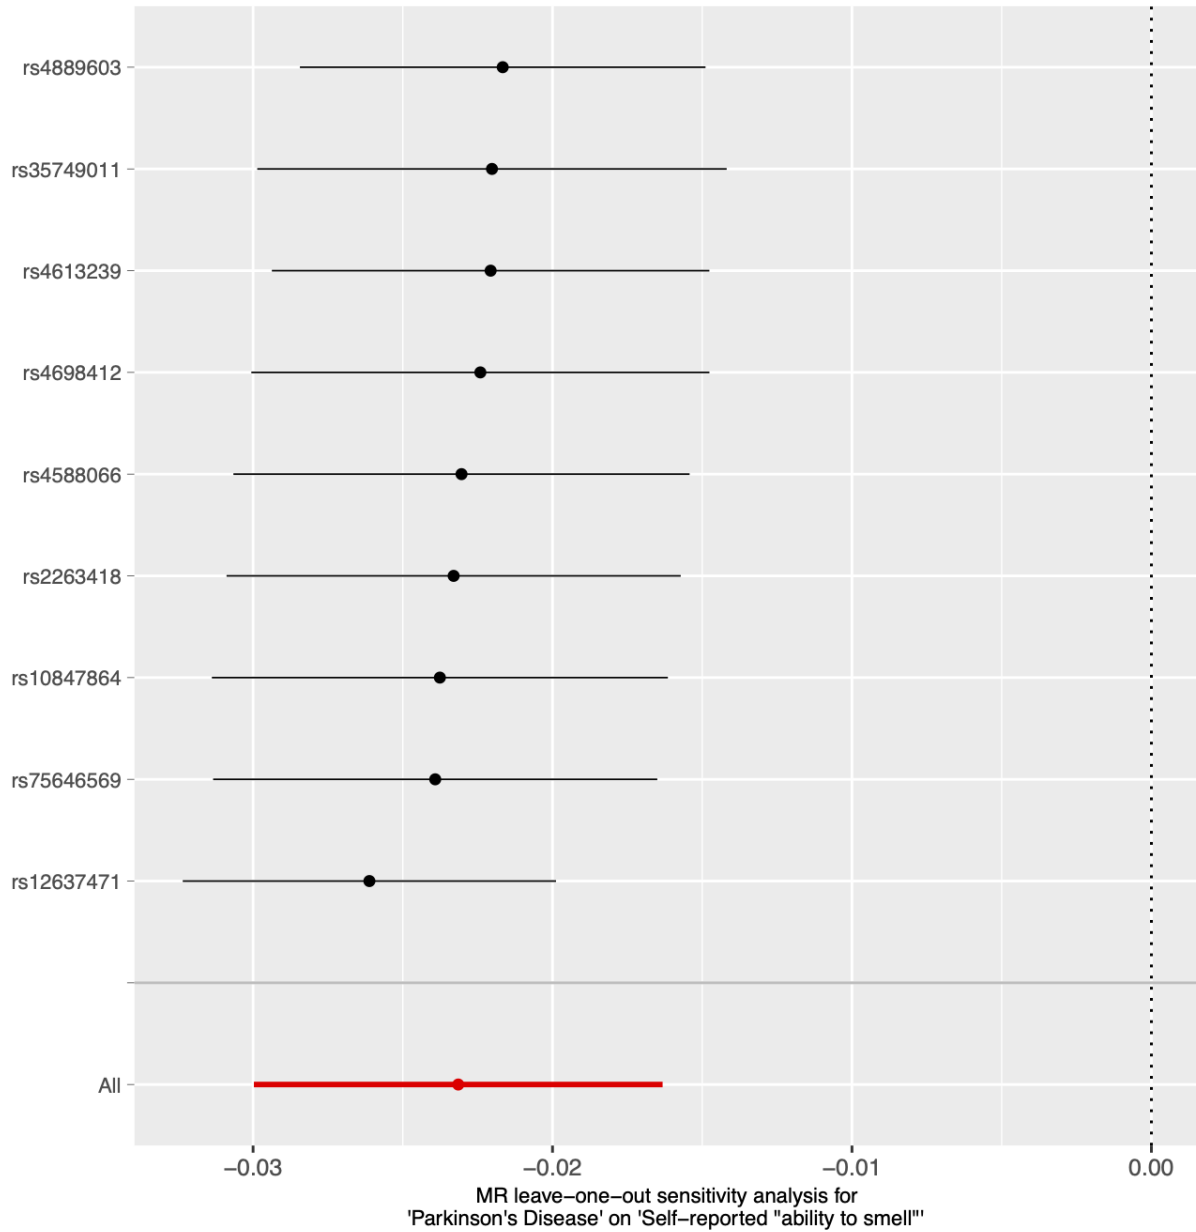

Ability to smell on PD

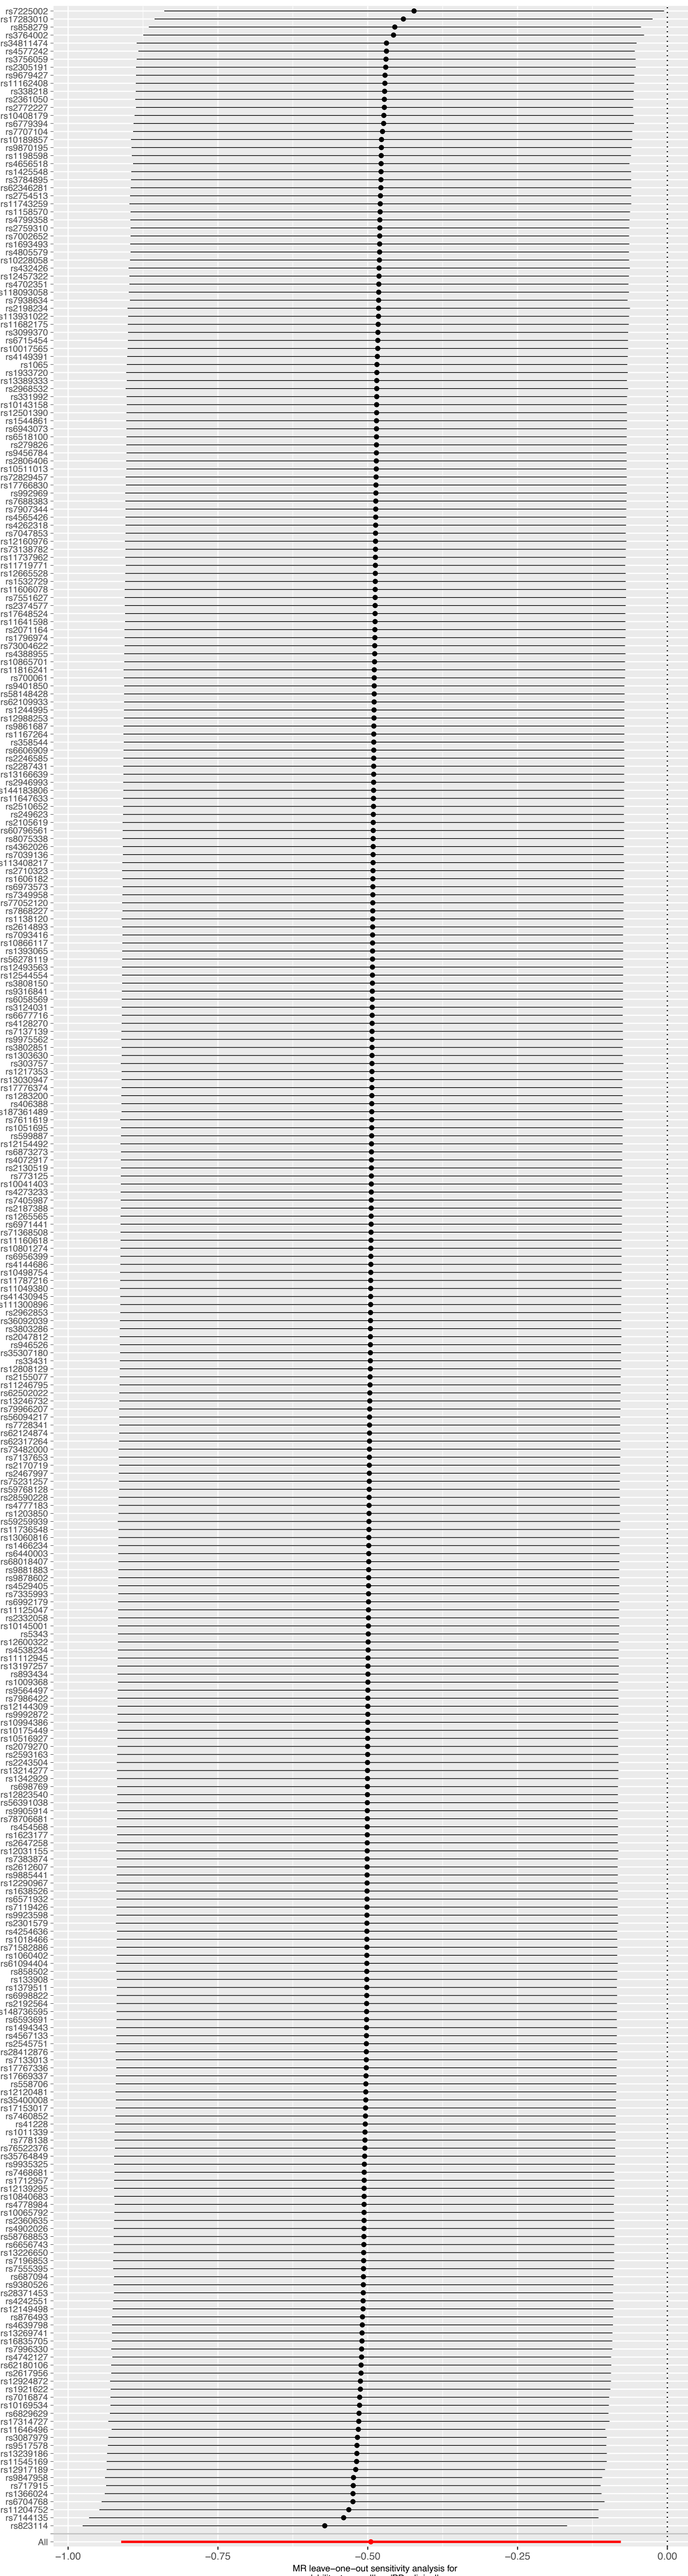

Ability to smell on PD (outliers removed)

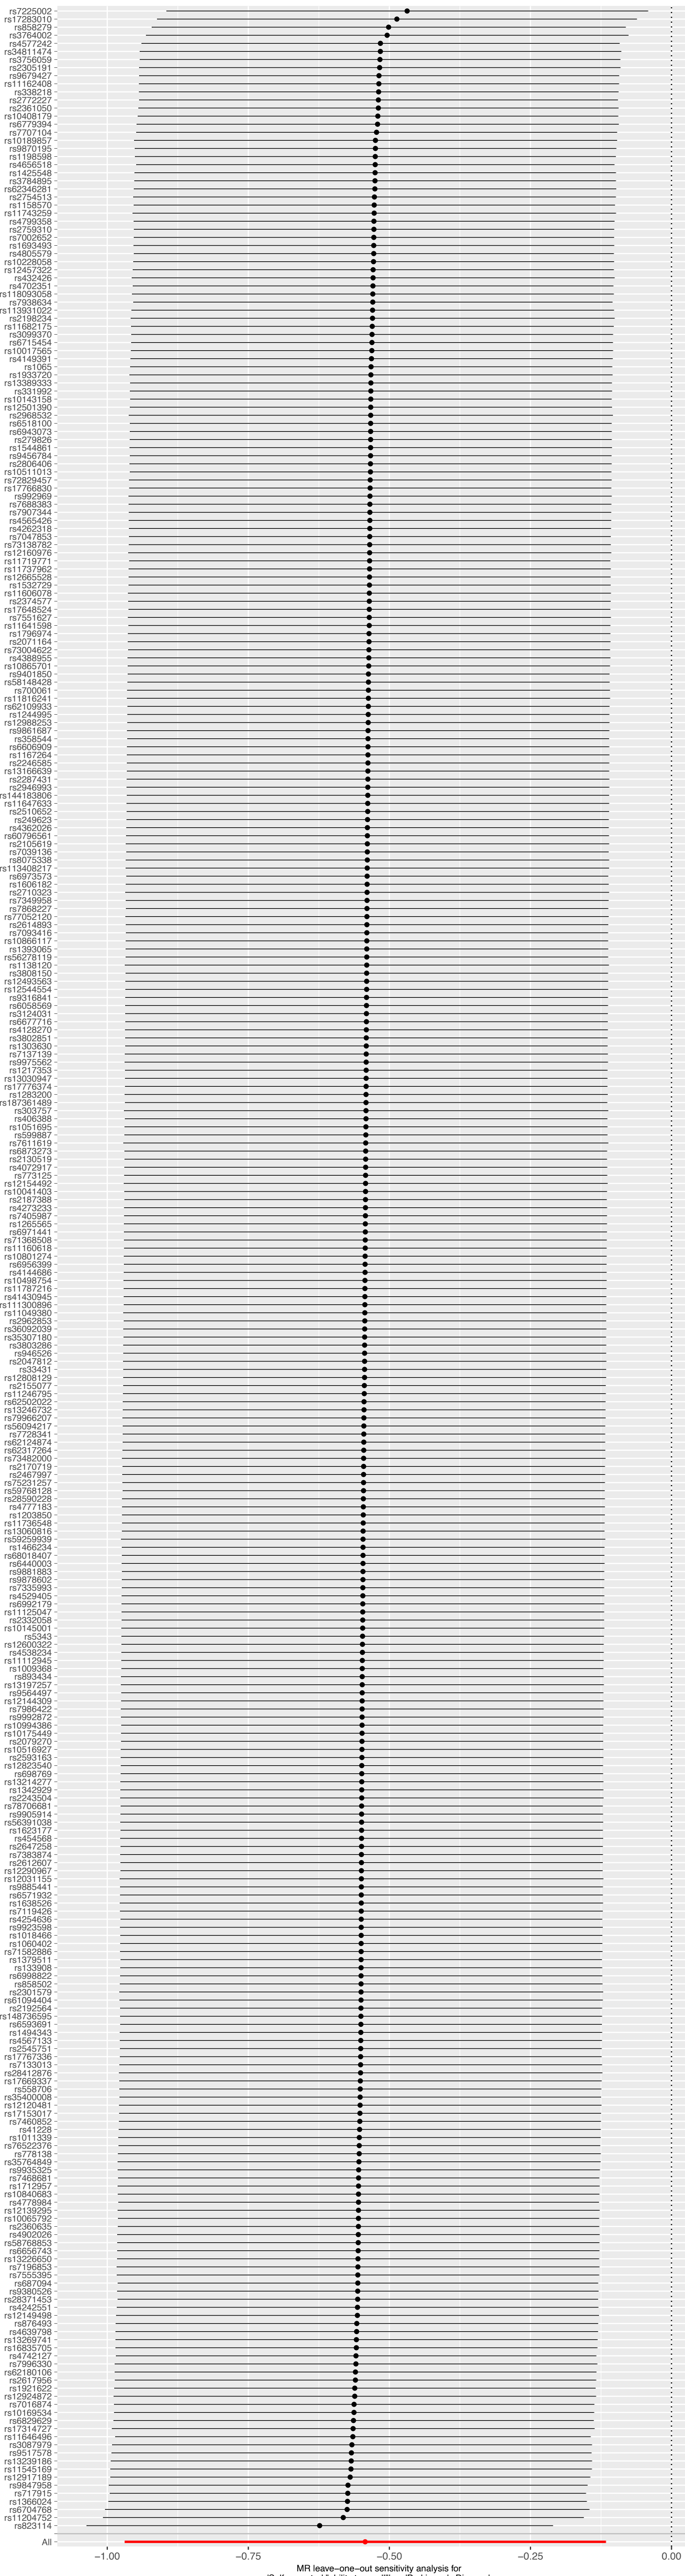

Supplementary Figure 3 - Forest plot of reverse-causation MR results



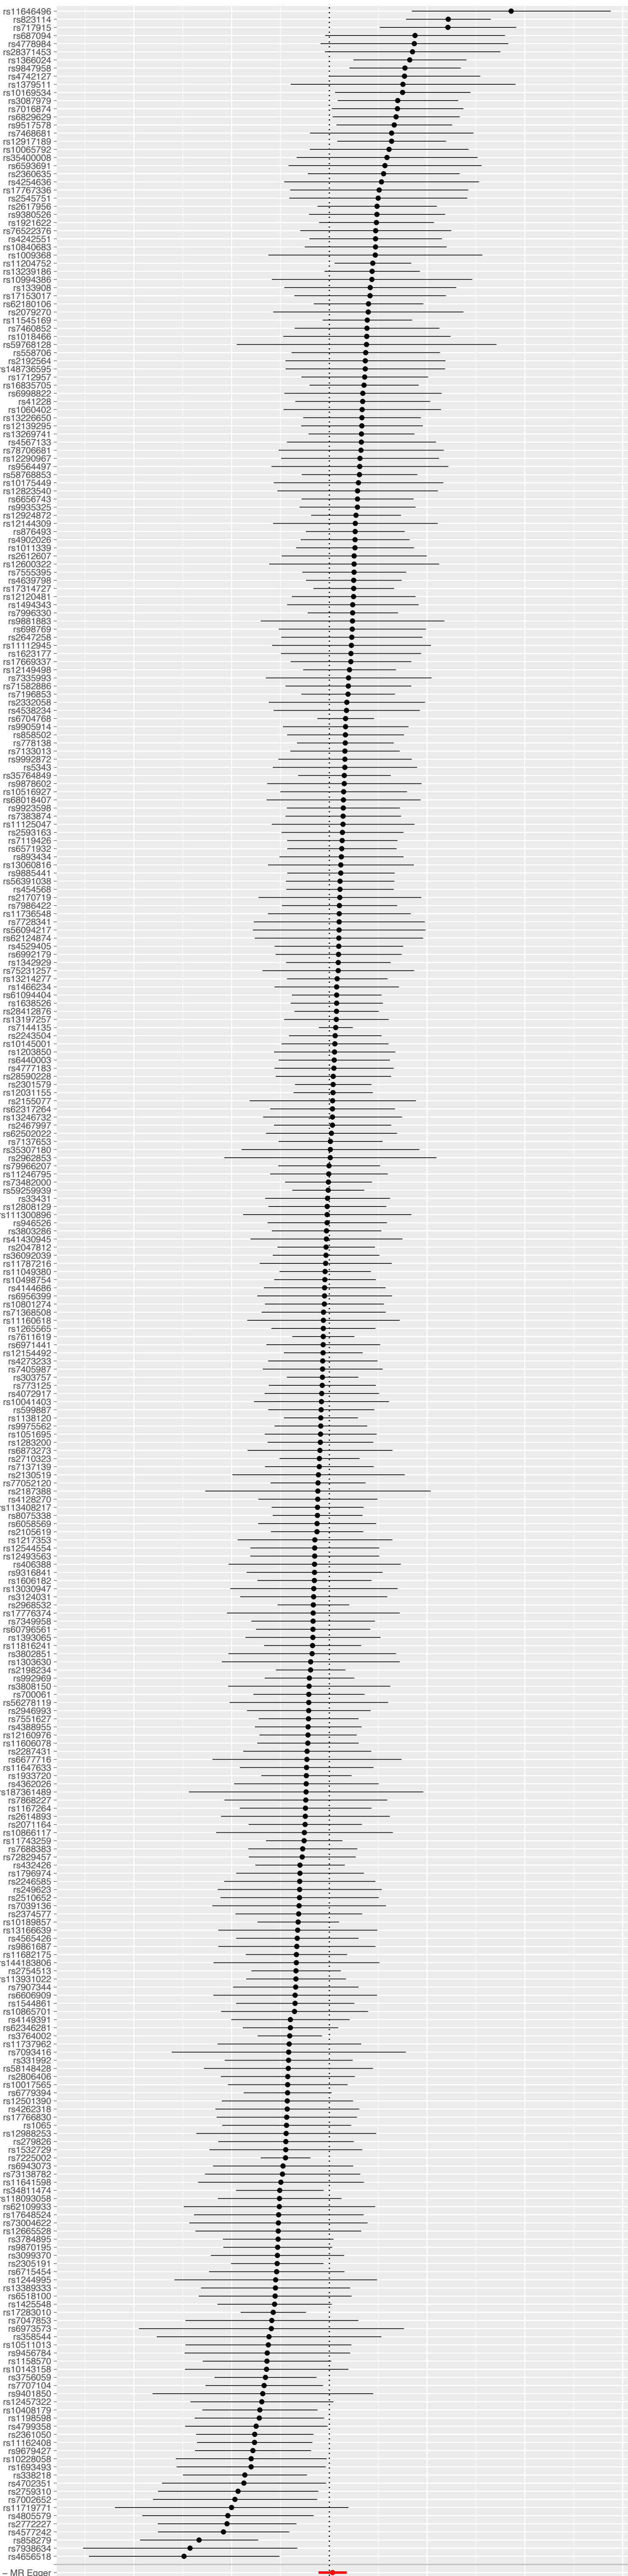

All - MR Egger  
 All - Inverse variance weighted

MR effect size for  
 'ability\_to\_smell' on 'PD\_clinical'

Supplementary Figure 4 - Scatter plot of reverse-causation MR results

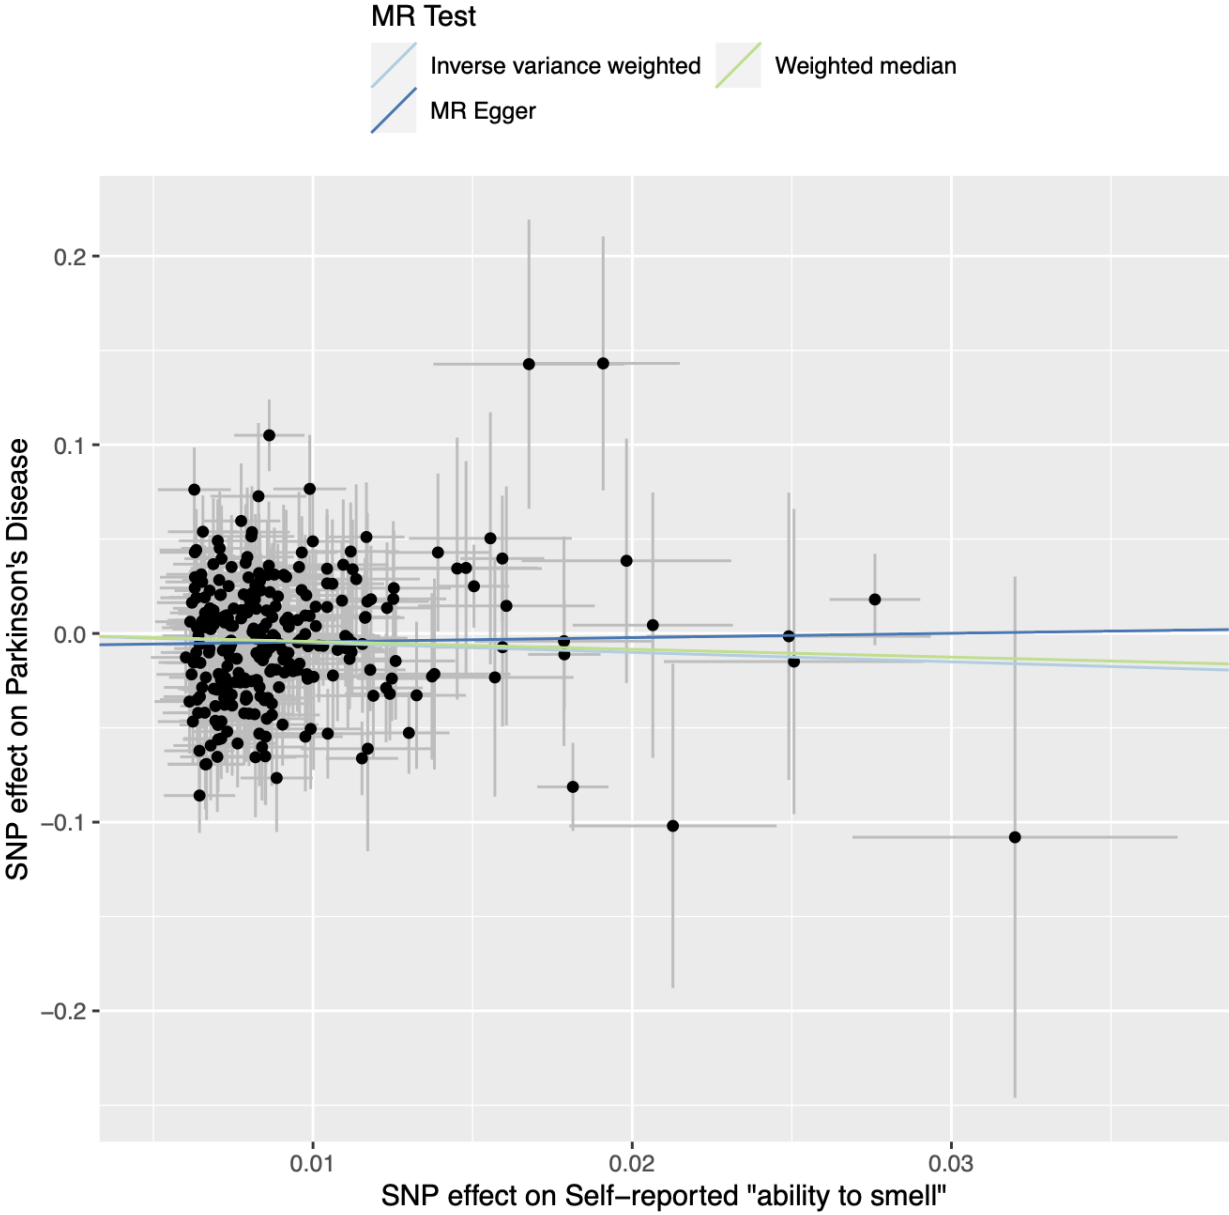

Supplementary Figure 5 - Scatter plot of outlier-removed reverse-causation MR results

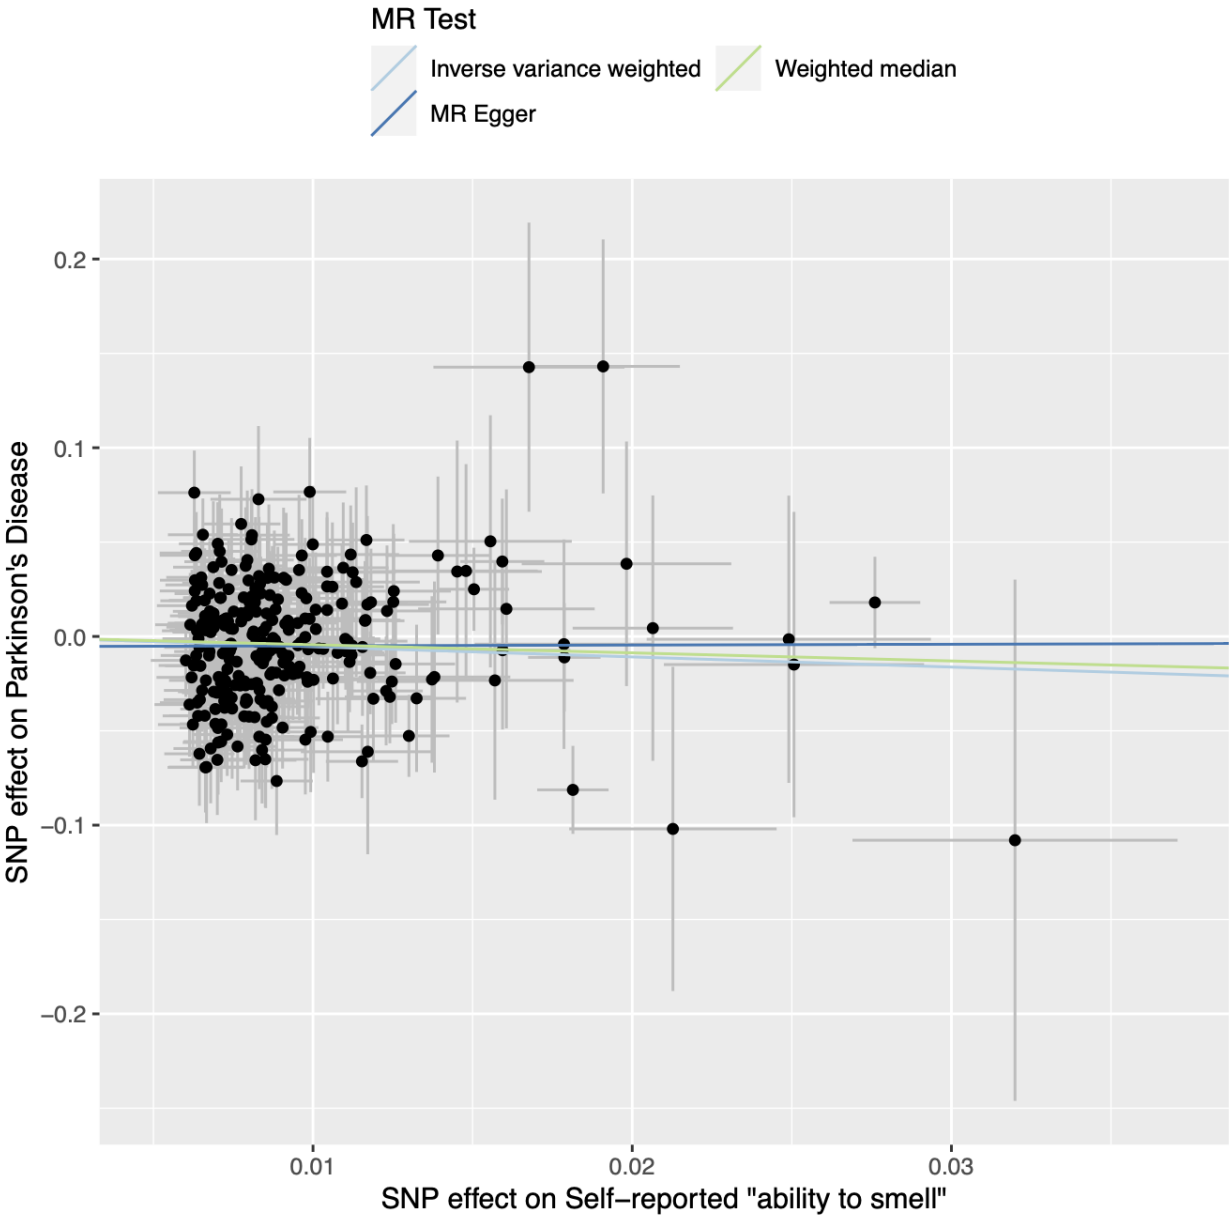

Supplement: Supplementary file [file media-1.pdf]
